# Supplementary material for: A comprehensive psychological tendency prediction model for pregnant women based on questionnaires
Source: PubMed Central journal article supplement (PMC9807629; doi:10.1038/s41598-022-26977-3), 2023-01-02
Supplement: 41598_2022_26977_MOESM1_ESM.pdf [file 41598_2022_26977_MOESM1_ESM.pdf]

## **A Questionnaire for Antenatal Depression in Pregnant Women**

### **A.1 The natural situation**

0.Number:

1.Name:

2.Age:

3.Ethnicity:

A.ethnic minorities B.Han nationality

4. Occupation:

A.worker B.farmer C.cadre D.medical staff E.Teacher F.staff G.waiter H.business I. no job J.other

5.Education level:

A.master's degree and above B.undergraduate C.specialist D.high school and below

6.Are you smoking?

A.no B.occasionally C.often D.<10 sticks/day E.10-30 sticks/day F.>30 sticks/day

7.Are you passive smoking?

A.no B.occasionally C.often D.<3 hours/day E.>3 hours/day

8.Are you exposed to drugs?

A.no B.yes

9.Are you drinking?

A.no B.occasionally C.liquor D.beer E.wine

10.Are you exposed to toxic and hazardous substances?

A.no B.radiation C.high temperature D.noise E.lead F.mercury G.pesticide H.decoration I.pet J.other

11.What is your family income?

A.2,000 yuan or less B.2000-5000 yuan C.5000-10000 yuan D.10,000 yuan or more

### **A.2 Pregnancy and disease history**

12.Your pregnancy history

A.no B.normal childbirth C.cesarean section D.induced abortion E.spontaneous abortion F.ectopic pregnancy G.premature birth H.stillbirth I.birth defects J.other

13.Do you have or have suffered from the following diseases?

A.no B.heart disease C.chronic nephritis D.high blood pressure E.diabetes F.thyroid disease H.other

14.Do you have or have suffered from the following infectious diseases?

A.no B.tuberculosis C.disease hepatitis D.rubella E.cytomegalovirus F.sexually transmitted diseases G.other:

15.Do you have or have suffered from mental illness?

A.yes B.no C.not sure

16.Are you currently taking the medicine?

A.no B.yes

17.Are you married to a close relative?

A.yes B.no

18.Is there a genetic disease in your family?

A.no B.hemophilia C.congenital heart disease and diabetes D.congenital mental retardation E.blind F.deaf G.dumb H.mental illness F. other J. uncertain

### **A.3 The state of mind**

19.Why do you want a baby?

A.my own wishes B.the wishes of the lover C.the common wishes of husband and wife D.the wishes of parents E.the pressure from other families and friends F.other:

20.What preparations are needed before pregnancy?

A.body B.economy C.psychology D.birth knowledge E.other

21.Are you ready to be a parent?

A.yes B.no C.uncertain

22.Do you think that children will influence the relationship between you and your lover?

A.yes B.no C.not sure

23.Do you care about the child's gender?

A.yes B.no C.uncertain

24.What do you worry about pregnancy?

A.whether the baby is healthy B.economic pressure C.discomfort caused by pregnancy D.labor pain E.baby affects my work and development F.baby occupies my private space G.body shape change H.other:

25.Do you think tension will affect conception?

A.yes B.no C.uncertain

26.Do you think nervous anxiety is caused by miscarriage?

A.yes B.no C.uncertain

27.Do you think mental stimulation affects fetal development?

A.yes B.no C.uncertain

28.Do you think tension can lead to ectopic pregnancy?

A.yes B.no C.uncertain

29.Do you feel pressure now?

A.yes B.no C.uncertain

30.How is your relationship with your lover?

A.harmony B.general C.nervous

31.How is your relationship with friends and relatives?

A.harmony B.general C.nervous

32.How is your relationship with your colleagues?

A.harmony B.general C.nervous

33.Do you currently have a tendency to depression?

A.yes B.no

34.Do you currently have an anxiety tendency?

A.yes B.no

#### **A.4 Demand survey**

35.Do you understand the psychological counseling and guidance of pre-pregnancy eugenics?

A.yes B.no

36.Have you received eugenic counseling and guidance before pregnancy?

A.yes B.no

37.Do you think it is necessary to have pre-pregnancy eugenics counseling and guidance?

A.yes B.no C.does not matter

38.How do you know about pre-pregnancy eugenics counseling and guidance?

A.wall newspaper column B.text and publicity materials C.network D.radio and television E.newspapers and magazines F.training lectures G.listen to people around you H.other:

39.Where do you receive pre-pregnancy eugenics counseling and guidance?

A.family planning service station B.maternal and child health center C.general hospital D.professional psychological counseling institutions

40.How did you conduct pre-pregnancy eugenics counseling and guidance?

A.separate consultation B.face-to-face consultation C.telephone consultation D.group training

41.What is your need for counseling and guidance for pre-pregnancy eugenics?

## B Psychological questionnaire for antenatal women

| Data item                     | Quantity |
|-------------------------------|----------|
| Han nationality               | 5328     |
| minority                      | 338      |
| worker                        | 542      |
| farmer                        | 2380     |
| cadre                         | 80       |
| medical staff                 | 122      |
| teacher                       | 275      |
| staff                         | 651      |
| waiter                        | 255      |
| business                      | 298      |
| unemployed                    | 650      |
| master degree and above       | 122      |
| bachelor                      | 811      |
| specialist                    | 942      |
| high school and below         | 3502     |
| do not smoke                  | 5121     |
| occasional smoking            | 164      |
| smoking<10 sticks / day       | 30       |
| smoking 10-30 / day           | 17       |
| smoking>30/day                | 2        |
| no passive smoking            | 4079     |
| occasionally passive smoking  | 989      |
| passive smoking< 3hours / day | 82       |
| passive smoking>3 hours/day   | 120      |

| Data item                                                                           | Quantity |
|-------------------------------------------------------------------------------------|----------|
| contact with drugs                                                                  | 34       |
| no drinking                                                                         | 4852     |
| drinking occasionally                                                               | 477      |
| liquor                                                                              | 11       |
| beer                                                                                | 11       |
| wine                                                                                | 1        |
| no exposure to toxic and hazardous substances                                       | 5161     |
| radiation                                                                           | 13       |
| high temperature                                                                    | 13       |
| noise                                                                               | 26       |
| lead                                                                                | 4        |
| mercury                                                                             | 1        |
| pesticide                                                                           | 5        |
| decoration                                                                          | 52       |
| pet                                                                                 | 90       |
| family income below 2,000 yuan                                                      | 1406     |
| family income 2000-5000 yuan                                                        | 2891     |
| family income 5000-10000 yuan                                                       | 858      |
| family income more than 10,000 yuan                                                 | 224      |
| no history of pregnancy                                                             | 3082     |
| normal childbirth                                                                   | 1060     |
| cesarean section                                                                    | 480      |
| artificial abortion                                                                 | 870      |
| natural abortion                                                                    | 179      |
| ectopic pregnancy                                                                   | 24       |
| premature birth                                                                     | 4        |
| stillborn stillbirth                                                                | 29       |
| birth defect                                                                        | 9        |
| No heart disease, chronic nephritis, high blood pressure, diabetes, thyroid disease | 5238     |
| have or have suffered heart disease                                                 | 42       |
| have or have suffered chronic nephritis                                             | 26       |
| have or have suffered high blood pressure                                           | 16       |
| have or have suffered diabetes                                                      | 9        |
| have or have suffered thyroid disease                                               | 32       |
| have not had tuberculosis, viral hepatitis,                                         |          |

| Data item                                                                                                                                                         | Quantity |
|-------------------------------------------------------------------------------------------------------------------------------------------------------------------|----------|
| rubella, cytomegalovirus, sexually transmitted diseases                                                                                                           | 5226     |
| have or have suffered tuberculosis                                                                                                                                | 26       |
| have or have suffered viral hepatitis                                                                                                                             | 66       |
| have or have suffered rubella                                                                                                                                     | 21       |
| have or have suffered cytomegalovirus                                                                                                                             | 9        |
| have or have suffered a sexually transmitted disease                                                                                                              | 11       |
| have or have suffered a mental illness                                                                                                                            | 106      |
| have not had or have had a mental disorder                                                                                                                        | 5210     |
| not sure if you have or have suffered from a mental disorder                                                                                                      | 44       |
| Are you currently taking the medicine?                                                                                                                            | 334      |
| Are you married to a close relative?                                                                                                                              | 66       |
| no genetic diseases in the family (hemophilia, congenital heart disease, diabetes, congenital mental retardation, blindness, paralysis, dumbness, mental illness) | 5281     |
| not sure if there is a genetic disease in the family                                                                                                              | 17       |
| hemophilia in the family                                                                                                                                          | 26       |
| family with congenital heart disease diabetes                                                                                                                     | 4        |
| family with congenital mental retardation                                                                                                                         | 1        |
| family with blind                                                                                                                                                 | 2        |
| family with deaf                                                                                                                                                  | 2        |
| family with mute                                                                                                                                                  | 1        |
| family with mental illness                                                                                                                                        | 27       |
| your own wishes (the reason for wanting a baby)                                                                                                                   | 573      |
| the desire of your lover (the reason for wanting a baby)                                                                                                          | 401      |
| the common wishes of husband and wife (the reason for wanting a baby)                                                                                             | 4279     |
| the wishes of parents (the reason for wanting a baby)                                                                                                             | 602      |
| the pressure from other families and friends (the reason for wanting a baby)                                                                                      | 29       |
| body(what preparations are needed before pregnancy)                                                                                                               | 4067     |
| economy(what preparations are needed before pregnancy)                                                                                                            | 2150     |
| psychology(what preparations are needed before pregnancy)                                                                                                         | 2296     |
| birth knowledge (what preparations are needed before pregnancy)                                                                                                   | 2521     |
| be prepared for parents                                                                                                                                           | 4730     |
| not ready for parents                                                                                                                                             | 422      |
| not sure if you are ready for parents                                                                                                                             | 202      |
| children will influence the relationship with your lover                                                                                                          | 398      |
| children will not affect the relationship with your lover                                                                                                         | 4610     |
| not sure whether child will affect the relationship with the lover                                                                                                | 345      |
| concerned about the child's gender                                                                                                                                | 538      |

| Data item                                                           | Quantity |
|---------------------------------------------------------------------|----------|
| don't care about the child's gender                                 | 4582     |
| not sure if you care about your child's gender                      | 240      |
| worried about whether your baby is healthy                          | 4488     |
| worried about economic pressure                                     | 782      |
| worried about the discomfort caused by pregnancy                    | 729      |
| worried about labor pain                                            | 601      |
| baby affects work and development                                   | 141      |
| worried that the baby occupies your own private space               | 207      |
| worried about body shape changes                                    | 337      |
| think that tension will affect conception                           | 2713     |
| think that tension does not affect conception                       | 1639     |
| not sure whether tension affects conception                         | 1020     |
| think that nervous anxiety can cause miscarriage                    | 3046     |
| think that nervous anxiety and fear will not cause miscarriage      | 1138     |
| not sure whether nervous anxiety or fear causes abortion            | 1168     |
| think that mental stimulation affects fetal development             | 3279     |
| think that mental stimulation does not affect fetal development     | 1001     |
| not sure whether mental stimulation affects fetal development       | 1070     |
| think that tension can lead to ectopic pregnancy                    | 2239     |
| think that tension does not lead to ectopic pregnancy               | 1371     |
| not sure whether tension leads to ectopic pregnancy                 | 1732     |
| feel pressure now                                                   | 774      |
| don't feel pressure at the moment                                   | 3999     |
| not sure if there is pressure now                                   | 585      |
| harmony(the relationship with the lover)                            | 5246     |
| general(relationship with a lover)                                  | 83       |
| nervous (relationship with a lover)                                 | 26       |
| harmony(with friends and relatives)                                 | 5214     |
| general(relationship with relatives and friends)                    | 112      |
| nervous(relationship with relatives and friends)                    | 26       |
| harmony(relationship with colleagues)                               | 5163     |
| general(relationship with colleagues)                               | 155      |
| nervous(relationship with colleagues)                               | 24       |
| is there a tendency to depression                                   | 345      |
| is there an anxiety tendency at present                             | 205      |
| do you know about pre-pregnancy eugenics counseling and guidance    | 2736     |
| have you received eugenics counseling and guidance before pregnancy | 2261     |
| pre-pregnancy eugenics counseling and guidance are necessary        | 3534     |

| Data item                                                                                                           | Quantity |
|---------------------------------------------------------------------------------------------------------------------|----------|
| there is no need for pre-pregnancy eugenics counseling and guidance                                                 | 970      |
| no pre-pregnancy eugenics counseling and guidance                                                                   | 818      |
| through the wall newspaper column to understand the psychological counseling and guidance of pre-pregnancy eugenics | 855      |
| understanding the psychological counseling and guidance of pre-pregnancy eugenics through texts and propaganda      | 1052     |
| understanding the psychological counseling and guidance of pre-pregnancy eugenics through the network               | 2492     |
| understanding the psychological counseling and guidance of pre-pregnancy eugenics through radio and television      | 1354     |
| through newspapers and magazines to understand the psychological counseling and guidance of pre-pregnancy eugenics  | 313      |
| through training seminars to understand the psychological counseling and guidance of pre-pregnancy eugenics         | 704      |
| by listening to people around you to understand the psychological counseling and guidance of pre-pregnancy eugenics | 838      |
| family planning service station (accepting pre-pregnancy eugenics counseling and guidance location)                 | 3046     |
| maternal and child health center(receiving pre-pregnancy eugenics counseling and guidance locations)                | 1402     |
| general hospital (accepting pre-pregnancy eugenics counseling and guidance locations)                               | 864      |
| professional psychological counseling agency(accepting pre-pregnancy eugenics counseling and guidance locations)    | 539      |
| consultation alone (pre-pregnancy eugenics counseling and guidance)                                                 | 1227     |
| face-to-face consultation (pre-pregnancy eugenics counseling and guidance)                                          | 1954     |
| telephone consultation (pre-pregnancy eugenics counseling and guidance)                                             | 1142     |
| group training(pre-pregnancy eugenics counseling and guidance)                                                      | 1025     |
| not sure if you care about your child's gender                                                                      | 240      |
| worried about whether your baby is healthy                                                                          | 4488     |
| worried about economic pressure                                                                                     | 782      |
| worried about the discomfort caused by pregnancy                                                                    | 729      |
| worried about labor pain                                                                                            | 601      |
| baby affects work and development                                                                                   | 141      |

| Data item                                                                                                           | Quantity |
|---------------------------------------------------------------------------------------------------------------------|----------|
| worried that the baby occupies your own private space                                                               | 207      |
| worried about body shape changes                                                                                    | 337      |
| think that tension will affect conception                                                                           | 2713     |
| think that tension does not affect conception                                                                       | 1639     |
| not sure whether tension affects conception                                                                         | 1020     |
| think that nervous anxiety can cause miscarriage                                                                    | 3046     |
| think that nervous anxiety and fear will not cause miscarriage                                                      | 1138     |
| not sure whether nervous anxiety or fear causes abortion                                                            | 1168     |
| think that mental stimulation affects fetal development                                                             | 3279     |
| think that mental stimulation does not affect fetal development                                                     | 1001     |
| not sure whether mental stimulation affects fetal development                                                       | 1070     |
| think that tension can lead to ectopic pregnancy                                                                    | 2239     |
| think that tension does not lead to ectopic pregnancy                                                               | 1371     |
| not sure whether tension leads to ectopic pregnancy                                                                 | 1732     |
| feel pressure now                                                                                                   | 774      |
| don't feel pressure at the moment                                                                                   | 3999     |
| not sure if there is pressure now                                                                                   | 585      |
| harmony(the relationship with the lover)                                                                            | 5246     |
| general(relationship with a lover)                                                                                  | 83       |
| nervous (relationship with a lover)                                                                                 | 26       |
| harmony(with friends and relatives)                                                                                 | 5214     |
| general(relationship with relatives and friends)                                                                    | 112      |
| nervous(relationship with relatives and friends)                                                                    | 26       |
| harmony(relationship with colleagues)                                                                               | 5163     |
| general(relationship with colleagues)                                                                               | 155      |
| nervous(relationship with colleagues)                                                                               | 24       |
| is there a tendency to depression                                                                                   | 345      |
| is there an anxiety tendency at present                                                                             | 205      |
| do you know about pre-pregnancy eugenics counseling and guidance                                                    | 2736     |
| have you received eugenics counseling and guidance before pregnancy                                                 | 2261     |
| pre-pregnancy eugenics counseling and guidance are necessary                                                        | 3534     |
| there is no need for pre-pregnancy eugenics counseling and guidance                                                 | 970      |
| no pre-pregnancy eugenics counseling and guidance                                                                   | 818      |
| through the wall newspaper column to understand the psychological counseling and guidance of pre-pregnancy eugenics | 855      |
| understanding the psychological counseling and guidance of pre-pregnancy eugenics through texts and propaganda      | 1052     |



| Data item                                                                                                           | Quantity |
|---------------------------------------------------------------------------------------------------------------------|----------|
| understanding the psychological counseling and guidance of pre-pregnancy eugenics through the network               | 2492     |
| understanding the psychological counseling and guidance of pre-pregnancy eugenics through radio and television      | 1354     |
| through newspapers and magazines to understand the psychological counseling and guidance of pre-pregnancy eugenics  | 313      |
| through training seminars to understand the psychological counseling and guidance of pre-pregnancy eugenics         | 704      |
| by listening to people around you to understand the psychological counseling and guidance of pre-pregnancy eugenics | 838      |
| family planning service station (accepting pre-pregnancy eugenics counseling and guidance location)                 | 3046     |
| maternal and child health center(receiving pre-pregnancy eugenics counseling and guidance locations)                | 1402     |
| general hospital (accepting pre-pregnancy eugenics counseling and guidance locations)                               | 864      |
| professional psychological counseling agency(accepting pre-pregnancy eugenics counseling and guidance locations)    | 539      |
| consultation alone (pre-pregnancy eugenics counseling and guidance)                                                 | 1227     |
| face-to-face consultation (pre-pregnancy eugenics counseling and guidance)                                          | 1954     |
| telephone consultation (pre-pregnancy eugenics counseling and guidance)                                             | 1142     |
| group training(pre-pregnancy eugenics counseling and guidance)                                                      | 1025     |
